# Supplementary material for: Solving ZIB challenges: the dynamic role of water in deep eutectic solvents electrolyte
Source: Royal Society of Chemistry journal article supplement (doi:10.1039/d5ta00395d), 2025-01-01
Supplement: d5ta00395d1.pdf [file d5ta00395d1.pdf]

## Supporting Information

# Solving ZIB Challenges: The Dynamic Role of Water in Deep Eutectic Solvents electrolyte

E. Emanuele<sup>1\*</sup>, G. Batignani<sup>2</sup>, G. Cerullo<sup>3</sup>, G. Leita<sup>1</sup>, N. Madathiparambil Mohanan<sup>2</sup>, E. Mai<sup>2,4</sup>, M. Martinati<sup>2</sup>, C. Mele<sup>5</sup>, T. Scopigno<sup>2</sup>, B. Bozzini<sup>1</sup>

<sup>1</sup>Department of Energy, Politecnico di Milano, via Lambuschini 4, 20156 Milano, Italy

<sup>2</sup>Dipartimento di Fisica, Università di Roma "La Sapienza", Roma I-00185, Italy

<sup>3</sup>IFN-CNR, Dipartimento di Fisica, Politecnico di Milano, Piazza Leonardo da Vinci 32, I-20133 Milano, Italy

<sup>4</sup>Center for Life Nano Science Center for life Nano Science @Sapienza, Istituto Italiano di Tecnologia, Viale Regina Elena 291, I-00161 Roma, Italy

<sup>5</sup>Department of Innovation Engineering, University of Salento, Via Monteroni, 73100 Lecce, Italy

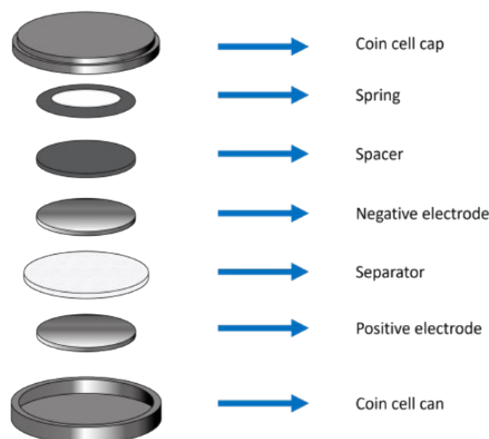

**Fig. S1** – Schematic of coin-cell structure and assembly.

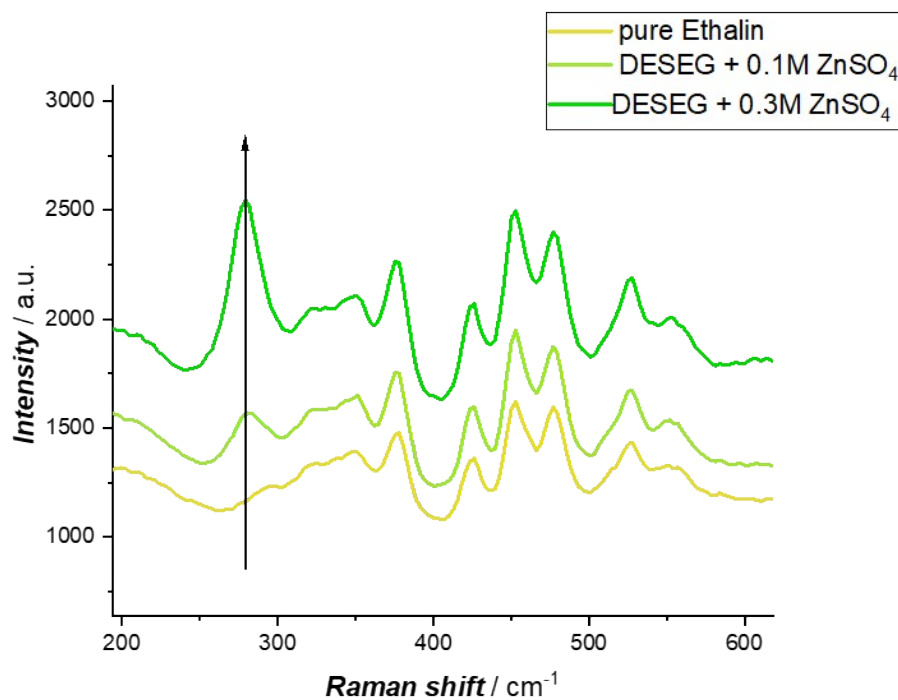

**Fig. S2** - Spontaneous Raman spectra of pure anhydrous ethaline, 0.1 M and 0.3 M ZnSO<sub>4</sub> DESEG electrolytes.

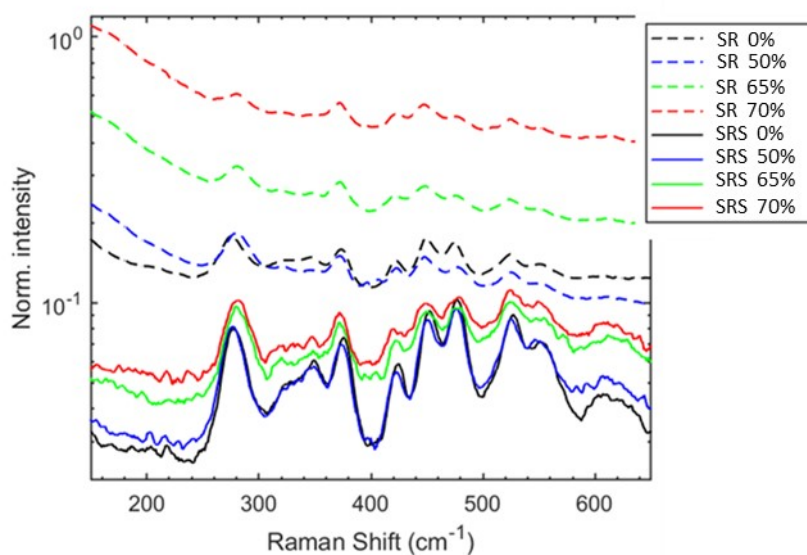

**Fig. S3** - Spontaneous Raman spectra (dot lines) and SRS (solid lines) of DESEG with different hydration levels. A logarithmic y-scale has been used for improved clarity.

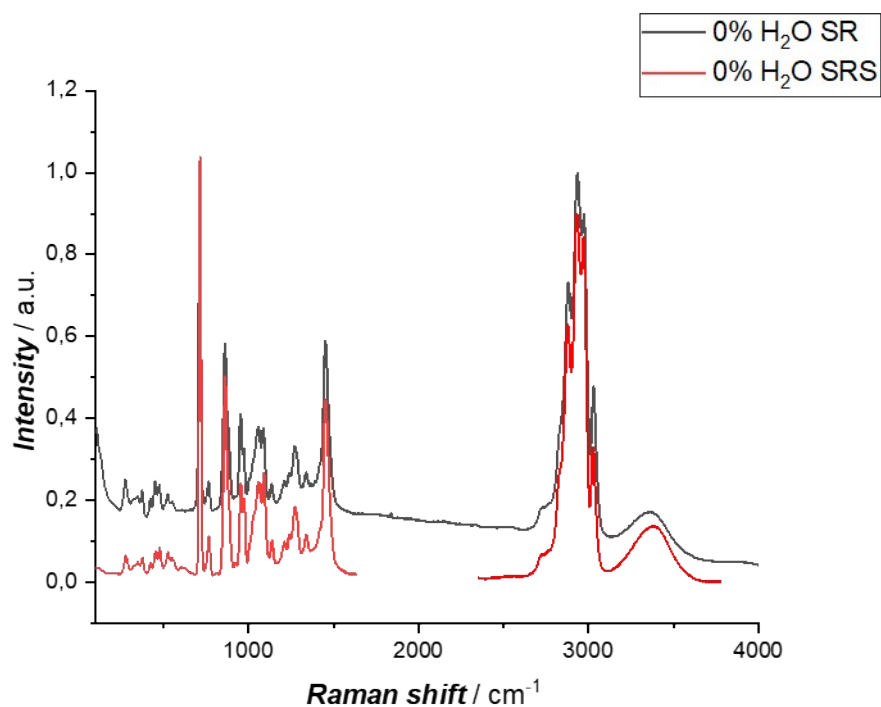

**Fig. S4** - Spontaneous Raman spectra (black line) and SRS (red line) of anhydrous DESEG.

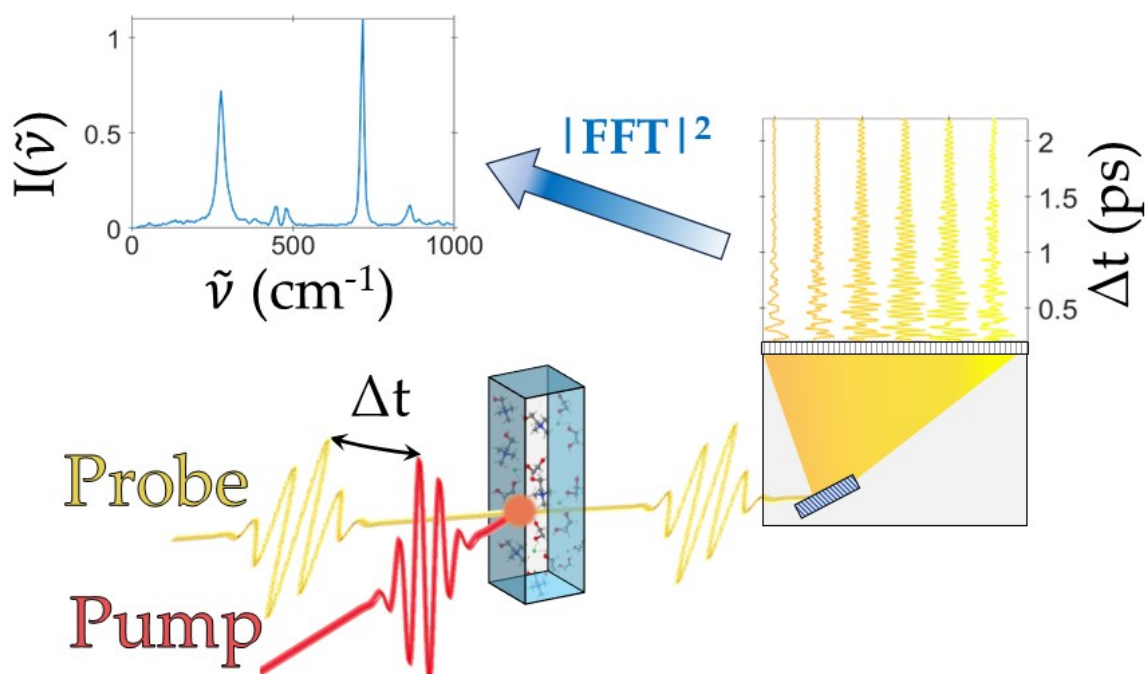

**Fig. S5** –Sketch of the Impulsive Stimulated Raman spectroscopy (IVS) experimental concept: two pulses are exploited to stimulate and read out vibrational excitations directly in the time-domain, as a function of the pulse delay ( $\Delta t$ ). Fast Fourier Transforming (FFT) over  $\Delta t$  allows for retrieving the vibrational response in the frequency-domain.

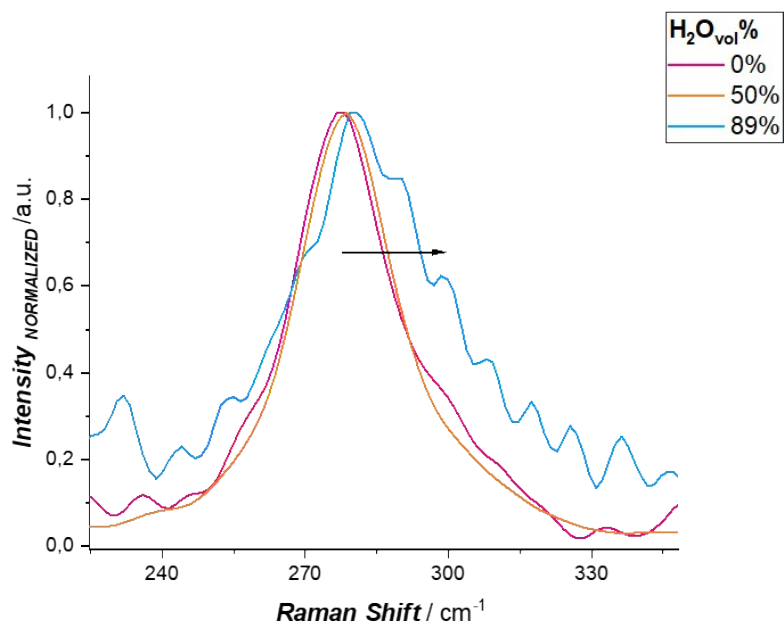

**Fig. S6** ISRS spectra normalized to the intensity of the Zn-Cl peak

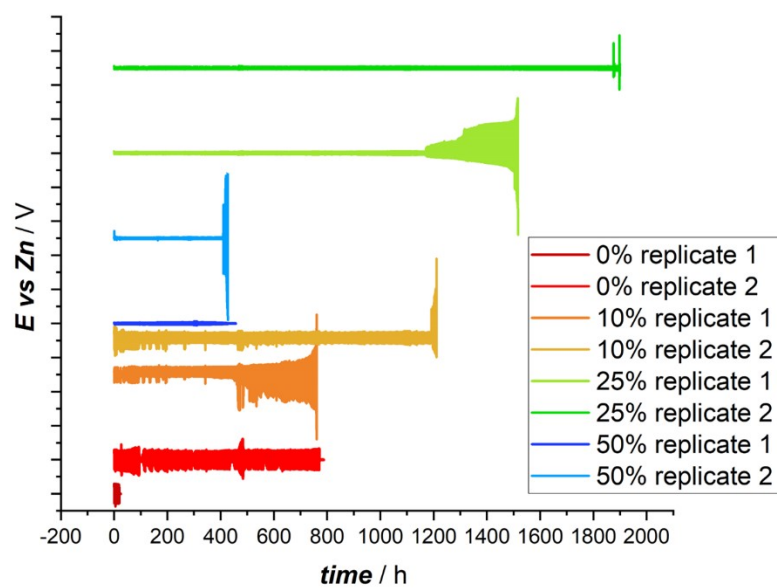

**Fig. S7** - Galvanostatic charge-discharge cycling experiments replicates carried out with Zn symmetric CR2032 coin cells DESEG with different hydration levels.
